# Supplementary material for: Plasmodium, the Apicomplexa Outlier When It Comes to Protein Synthesis
Source: MDPI journal article supplement (doi:10.3390/biom14010046), 2023-12-29
Supplement: s1 [file s1]

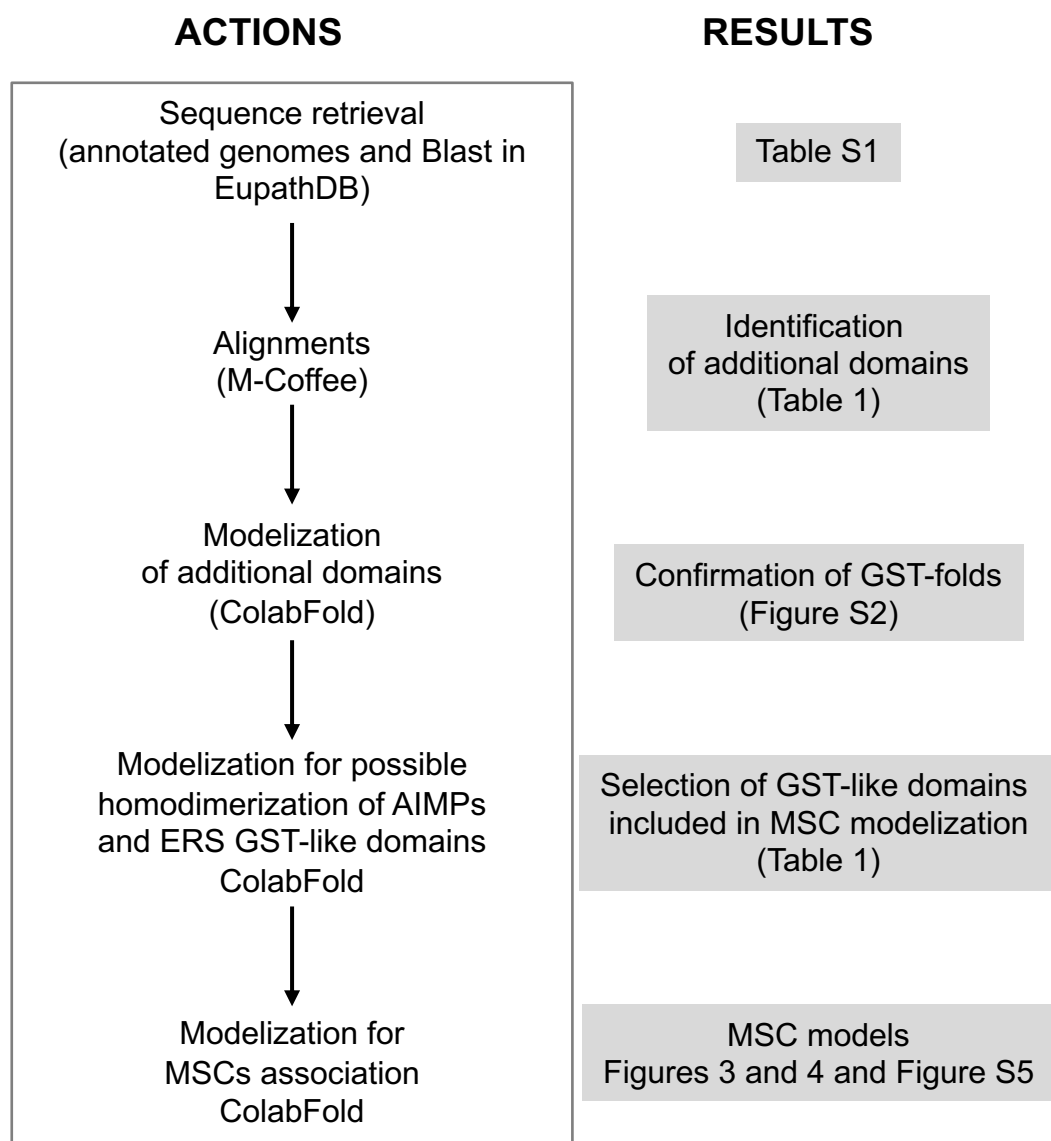

**Figure S1: Pipeline for modeling GST-like interactions in MSCs.** Global approach used to identify GST-like folds in AIMP and aaRSs and to model their association into MSCs with ColabFold. The occurrence of canonical interfaces 1, 1' and 2 in the resulting models suggest a positive interaction between GST-like domains.

Table S1. (A) Annotation of GST-like containing protein genes in EupathDB. (B) Additional domains identified in *Apicomplexa* aaRSs (except GST-like domains)

A

|                      | AIMPs and AARSs   |                   |                   |                                        |                   | Translation factors |                   |                   |                |
|----------------------|-------------------|-------------------|-------------------|----------------------------------------|-------------------|---------------------|-------------------|-------------------|----------------|
|                      | AIMP              | ERS               | MRS               | QRS                                    | YRS               | EF1-β               | EF1-γ             | EF1-α             | EF1-δ          |
| <i>P. berghei</i>    | PBANKA_1306200    | PBANKA_1362000    | PBANKA_0518700    | PBANKA_1346600                         | PBANKA_1222800    | PBANKA_0814200      | PBANKA_1352000    | PBANKA_1133300    | PBANKA_1218900 |
| <i>P. chabaudi</i>   | PCHAS_1309400     | PCHAS_1366600     | PCHAS_0518800     | PCHAS_1351200                          | PCHAS_1223400     | PCHAS_0814500       | PCHAS_1356600     | PCHAS_1133800     | PCHAS_1219600  |
| <i>P. falciparum</i> | PF3D7_1442300     | PF3D7_1349200     | PF3D7_1034900     | PF3D7_1331700                          | PF3D7_0807900     | PF3D7_0913200       | PF3D7_1338300     | PF3D7_1357100     | PF3D7_0319600  |
| <i>P. knowlesi</i>   | PKNH_1240000      | PKNH_1251700      | PKNH_0620100      | PKNH_1268800                           | PKNH_0110800      | PKNH_0711100        | PKNH_1263000      | PKNH_1114500      | PKNH_0821600   |
| <i>P. vivax</i>      | PVP01_1264700     | PVP01_1205600     | PVP01_0620000     | PVP01_1222900                          | PVP01_0112500     | PVP01_0711600       | PVP01_1216400     | PVP01_1114900     | PVP01_0820600  |
| <i>P. yoelii</i>     | PY17X_1310000     | PY17X_1367700     | PY17X_0519800     | PY17X_1351500                          | PY17X_1226000     | PY17X_0817500       | PY17X_1357200     | PY17X_1134900     | PY17X_1222100  |
| <i>B. bigemina</i>   | BBBOND_0102100    | BBBOND_0404120    | BBBOND_0207070    | BBBOND_0307760                         | BBBOND_0202210    | BBBOND_0110635      | BBBOND_0200780    | BBBOND_0108320    |                |
| <i>B. bovis</i>      | BBOV_III010240    | BBOV_III011840    | BBOV_I001970      | BBOV_II006400                          | BBOV_II002250     | BBOV_IV003370       | BBOV_II000890     | BBOV_IV010620     |                |
| <i>B. microti</i>    | BMR1_01G02705     | BmR1_04g04960     | BMR1_02g02000     | BMR1_03g03040                          | BMR1_01G00295     | BMR1_03g01425       | BMR1_02g03070     | BMR1_03g03725     |                |
| <i>T. annulata</i>   | TA11475           | TA17035           | TA05325           | TA12530                                | TA08075           | TA16305             | TA08705           | TA06720           |                |
| <i>T. orientalis</i> | TOT_020000112     | TOT_010001344     | TOT_030000712     | TOT_020000303                          | TOT_040000556     | TOT_010001036       | TOT_040000424     | TOT_010000685     |                |
| <i>T. parva</i>      | TpMuguga_02g00124 | TpMuguga_01g01053 | TpMuguga_03g00137 | TpMuguga_02g00322<br>TpMuguga_02g02375 | TpMuguga_04g00367 | TpMuguga_01g01096   | TpMuguga_04g00492 | TpMuguga_01g00726 |                |
| <i>C. hominis</i>    | Chro.40444        | Chro.80098        | Chro.80398        | Chro.10244                             | Chro.60344        | Chro.20423          | Chro.70492        | Chro.60459        |                |
| <i>C. muris</i>      | CMU_018940        | CMU_024700        | CMU_006170        | CMU_028890                             | CMU_031000        | CMU_003010          | CMU_014590        | ?                 |                |
| <i>C. parvum</i>     | cgd4_3880         | cgd8_790          | cgd8_3460         | cgd1_2130                              | cgd6_2970         | cgd2_3950           | cgd7_4450         | cgd6_3990         |                |
| <i>T. gondii</i>     | TGME49_223140     | TGME49_263870     | TGME49_289300     | TGME49_217460-126                      | TGME49_251880     | TGME49_226410       | TGME49_300140     | TGME49_294800     | TGME49_219140  |
| <i>N. caninum</i>    | NCLIV_006150      | NCLIV_024090      | NCLIV_041650      | NCLIV_062220                           | NCLIV_066920      | NCLIV_046550        | NCLIV_064580      | NCLIV_014180      | NCLIV_061340   |

B

|      | ARS                    | CRS | DRS | FRS-α        | FRS-β       | GRS | HRS | IRS | KRS          | LRS          | NRS          | PRS          | RRS        | SRS | TRS | VRS | YRS | WRS   |
|------|------------------------|-----|-----|--------------|-------------|-----|-----|-----|--------------|--------------|--------------|--------------|------------|-----|-----|-----|-----|-------|
| Nter | <i>Plasmodium</i>      | ASP | ASP | K-rich helix | DNA-binding |     | ASP | ?   | K-rich helix | K-rich helix |              | K-rich helix | Ybak       |     |     | ASP |     | Ala-X |
|      | <i>Toxoplasma</i>      |     | ?   | K-rich helix | DNA-binding |     | ASP | ?   | -            | K-rich helix |              | K-rich helix | Ybak       |     |     | ASP |     | Ala-X |
|      | <i>Neospora</i>        |     | ?   | K-rich helix | DNA-binding |     | ASP | ?   | -            | K-rich helix |              | K-rich helix | Ybak       |     |     |     |     | Ala-X |
|      | <i>Babesia</i>         |     |     | K-rich helix | DNA-binding |     | ASP | ?   | -            | K-rich helix |              | K-rich helix | Ybak       |     |     |     |     | Ala-X |
|      | <i>Theileria</i>       | ASP |     | K-rich helix | DNA-binding |     | ASP | ?   | -            | K-rich helix |              | K-rich helix | Ybak       |     |     | ASP |     | Ala-X |
|      | <i>Cryptosporidium</i> |     |     | K-rich helix | DNA-binding |     |     | ?   | -            | K-rich helix |              | K-rich helix | Ybak       |     |     |     |     |       |
| Cter | <i>Plasmodium</i>      |     |     |              |             |     |     |     | Zn binding   |              | tRNA binding |              | Zn binding |     |     |     |     |       |
|      | <i>Toxoplasma</i>      |     |     |              |             |     |     |     | Zn binding   |              | tRNA binding |              | Zn binding |     |     |     |     |       |
|      | <i>Neospora</i>        |     |     |              |             |     |     |     | Zn binding   |              | tRNA binding |              | Zn binding |     |     |     |     |       |
|      | <i>Babesia</i>         |     |     |              |             |     |     |     | Zn binding   |              | tRNA binding |              | Zn binding |     |     |     |     |       |
|      | <i>Theileria</i>       |     |     |              |             |     |     |     | Zn binding   |              | tRNA binding |              | Zn binding |     |     |     |     |       |
|      | <i>Cryptosporidium</i> |     |     |              |             |     |     |     | Zn binding   |              | tRNA binding |              | Zn binding |     |     |     |     |       |

ASP: Apicoplast Signal Peptide  
?: Peptide with no functional prediction  
Apicomplex-specific domain  
Eukaryote-specific domain

**A**

***PLASMODIUM***

*P. vivax*  
*P. yoelii*  
***P. berghei***  
*P. knowlesi*  
*P. falciparum*  
*P. chabaudi*

[illegible]

## ***THEILERIA***

*T.annulata*  
*T.orientalis*  
***T.parva***

[illegible]

## ***BABESIA***

*B. microti*  
*B. bigemina*  
***B. bovis***

[illegible]

*B. microti*  
*B. bigemina*  
***B. bovis***

**$\alpha 7$**

YNHIDALVKK  
FRHVSTWAQN  
YKHVSTWVQN  
.:\*.:.:.

## CRYPTOSPORIDIUM

*C. hominis*  
***C. parvum***  
*C. muris*

**RIDIU**

MDK---FGDISTAGRKKLNDYLSTRSYMNGVSPTQDDV EALYMIKAGG-FCDFQHI **CRYV**SHIQS  
MDK---FGDISTAGRKKLNDYLSTRSYMNGVSPQDDV EALYMIMKAGG-FCDFQHI **CRYV**SHIQS  
MLKIKGFGLDSTLEGKKKLDFLSNRTYFNGVNPQNDC NLVSELLAGTKYCSFPHI **CRYLEH**MRH  
\* \* \* \* \* : \* \* \* \* \* : \* \* \* \* \* : \* \* \* \* \* : \* \* \* \* \* : \* \* \* \* \* : \* \* \* \* \* : \* \* \* \* \* : \* \* \* \* \*

## ***TOXOPLASMA/NEOSPORA***

*T. gondii*  
*N. caninum*


  
 MVVPDFGNLKS DIGVKLNEYLASRSFITGYS**ATQDDAI**IFSKLLGAPNATK FVDAS**RWY**RHVS HFSVPVQKAAM
   
 MVVPDFGNLKS DIGVKLNEYLASRSFITGY**ATQDDAI**IFSKLLGAPNATK FVDAS**RWY**RHVS HFSVPVQKAAM
   
 \*\*\*\*\*

# B

# PLASMODIUM

*P. vivax*  
*P. yoelii*  
***P. berghei***  
*P. knowlesi*  
*P. falciparum*  
*P. chabaudi*

*P. vivax*  
*P. yoelii*  
***P. berghei***  
*P. knowlesi*  
*P. falciparum*  
*P. chabaudi*

[illegible]

*P. vivax*  
*P. yoelii*  
***P. berghei***  
*P. knowlesi*  
*P. falciparum*  
*P. chabaudi*

[illegible]

Figure S2

# THEILERIA

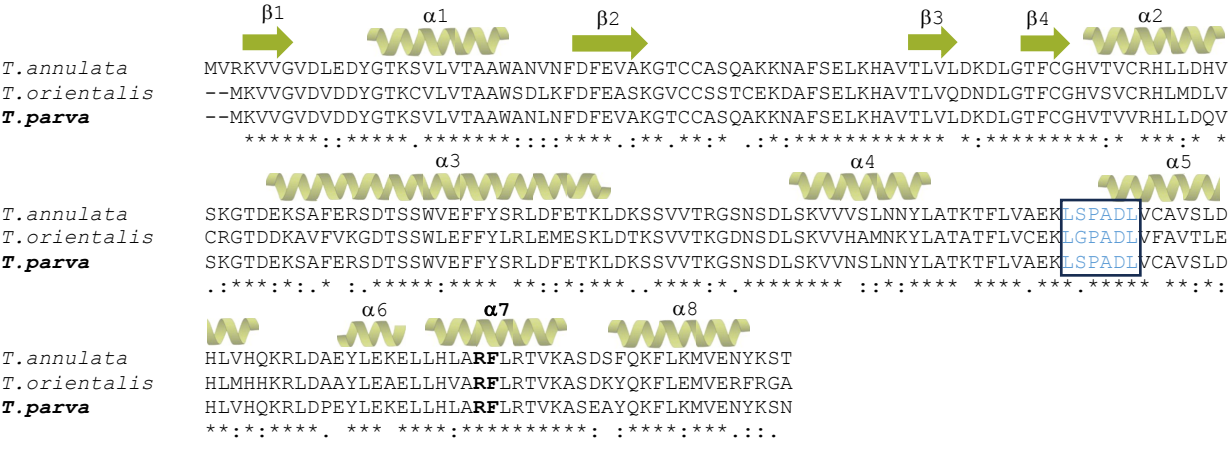

# BABESIA

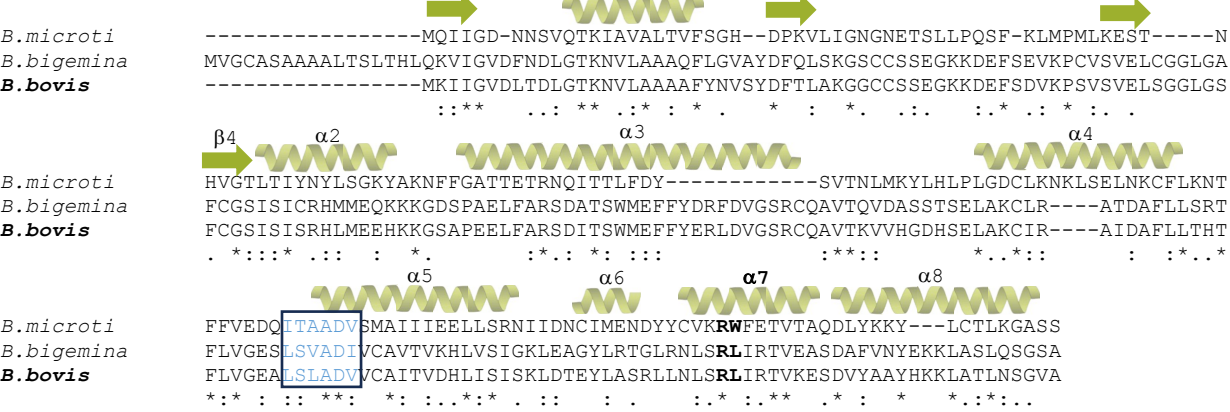

# CRYPTOSPORIDIUM

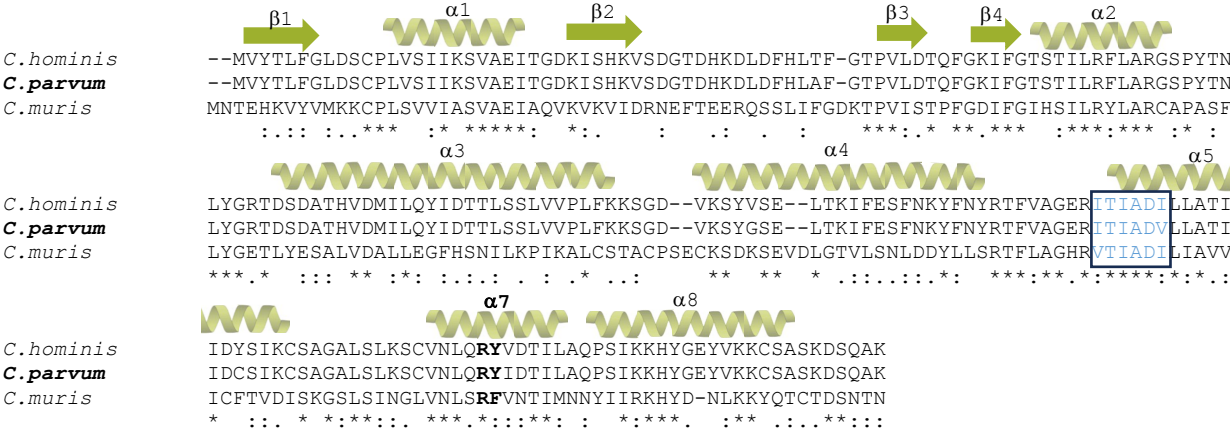

# TOXOPLASMA/NEOSPOA

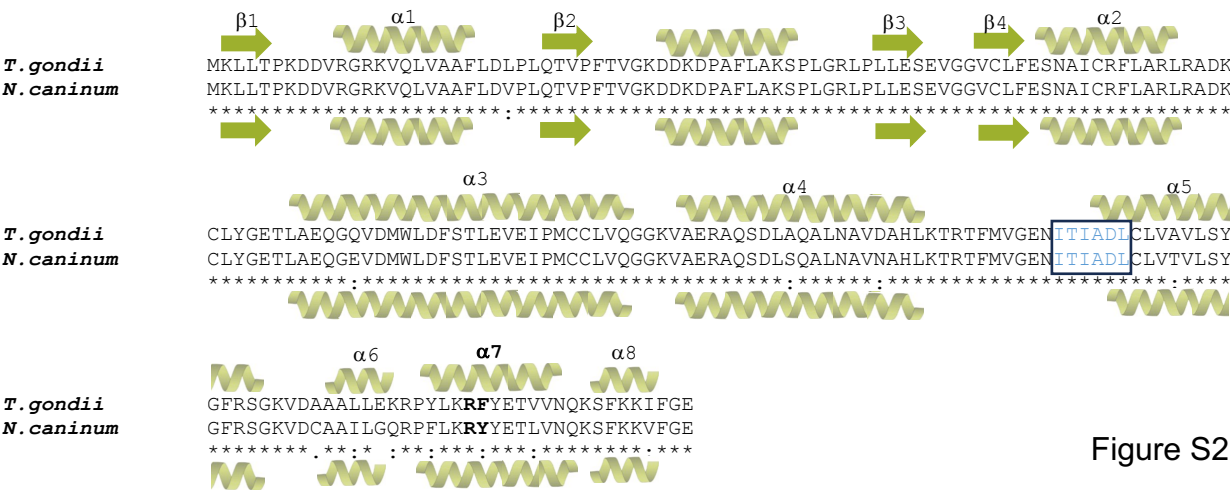

Figure S2

***PLASMODIUM*** (tRip)

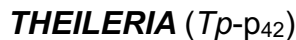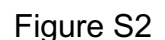

[illegible][illegible]

Figure S2

**TOXOPLASMA (Tg-p43) / NEOSPORA (Nc-p47)**

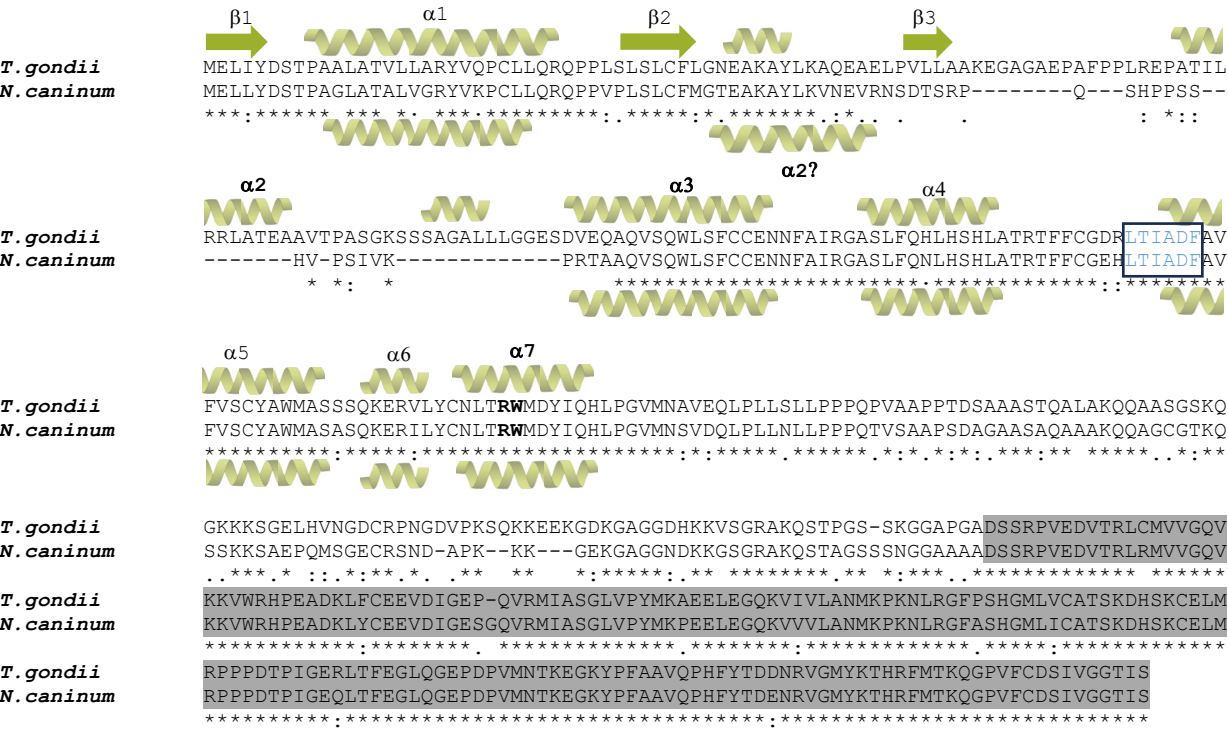

**Phylogenetic tree based on full sequence alignments of Apicomplexa AIMP**

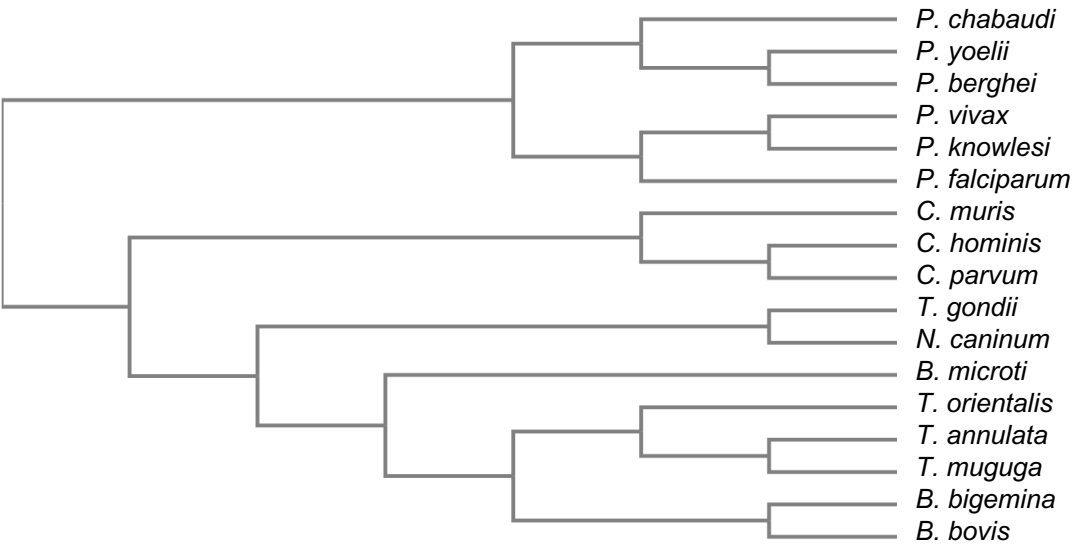

Figure S2

## D GST-like ERSs

# PLASMODIUM

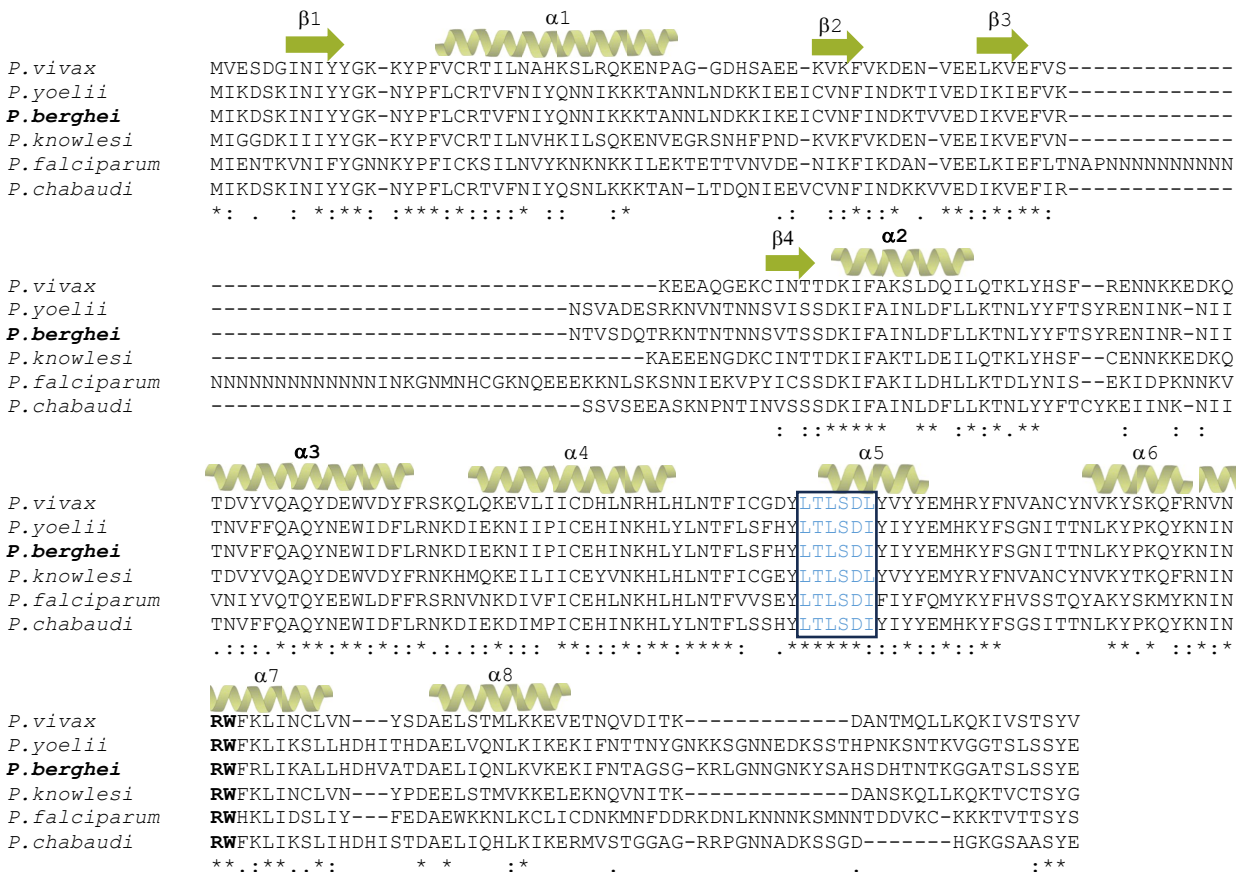

## ***THEILERIA***

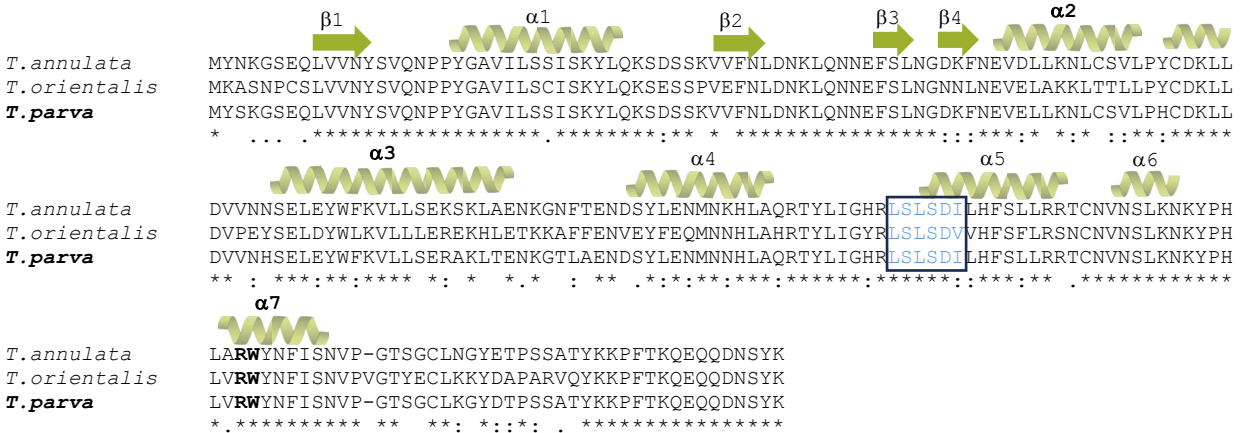

## **BABESIA**

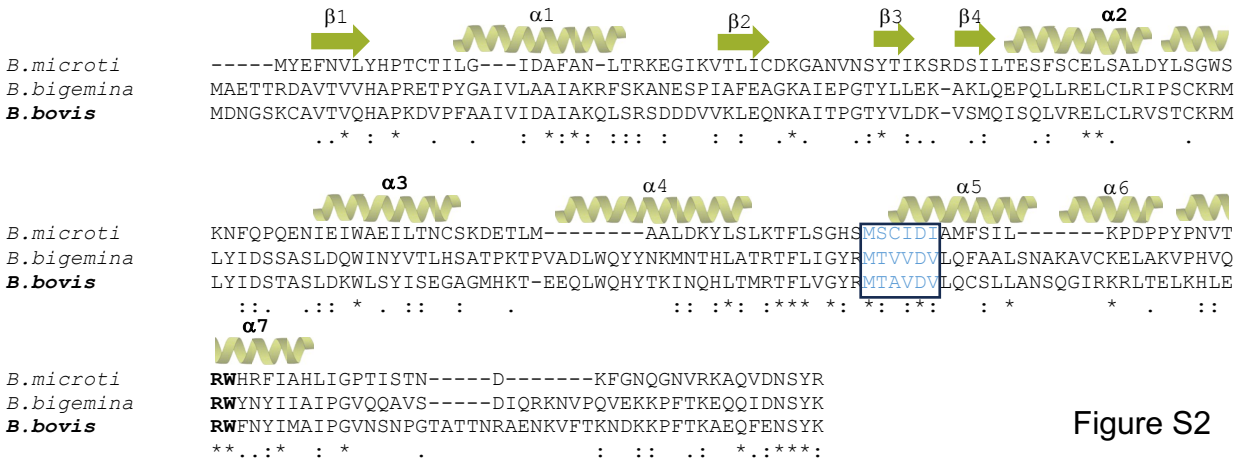

Figure S2

TOXOPLASMA / NEOSPORA

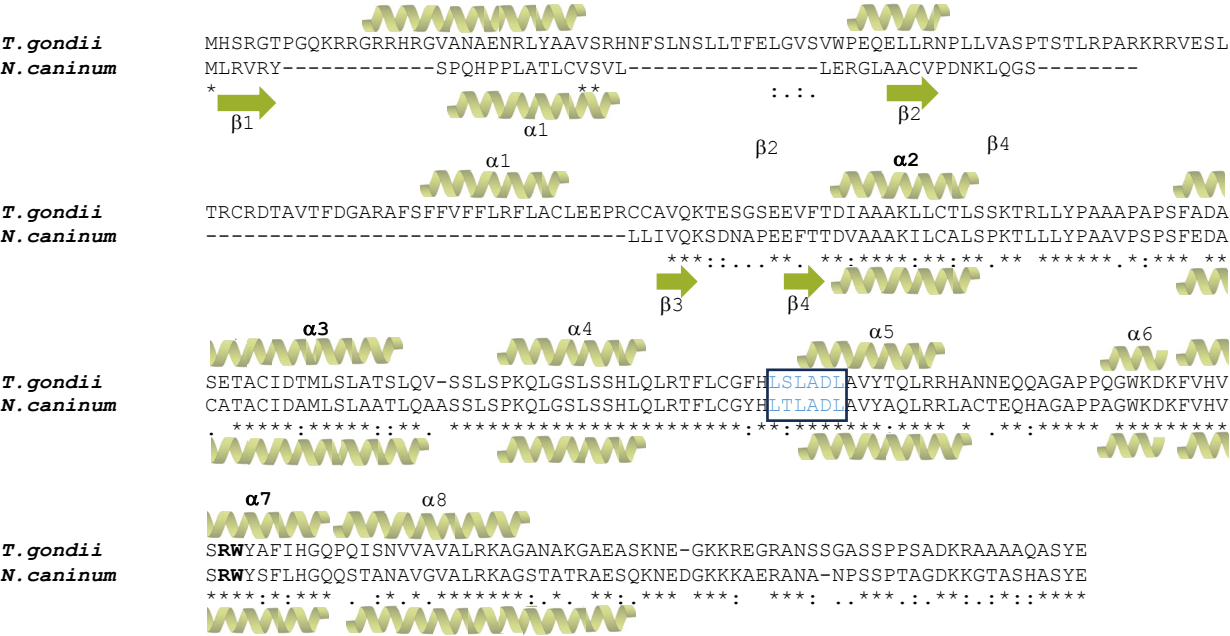

Figure S2

# E

## PLASMODIUM

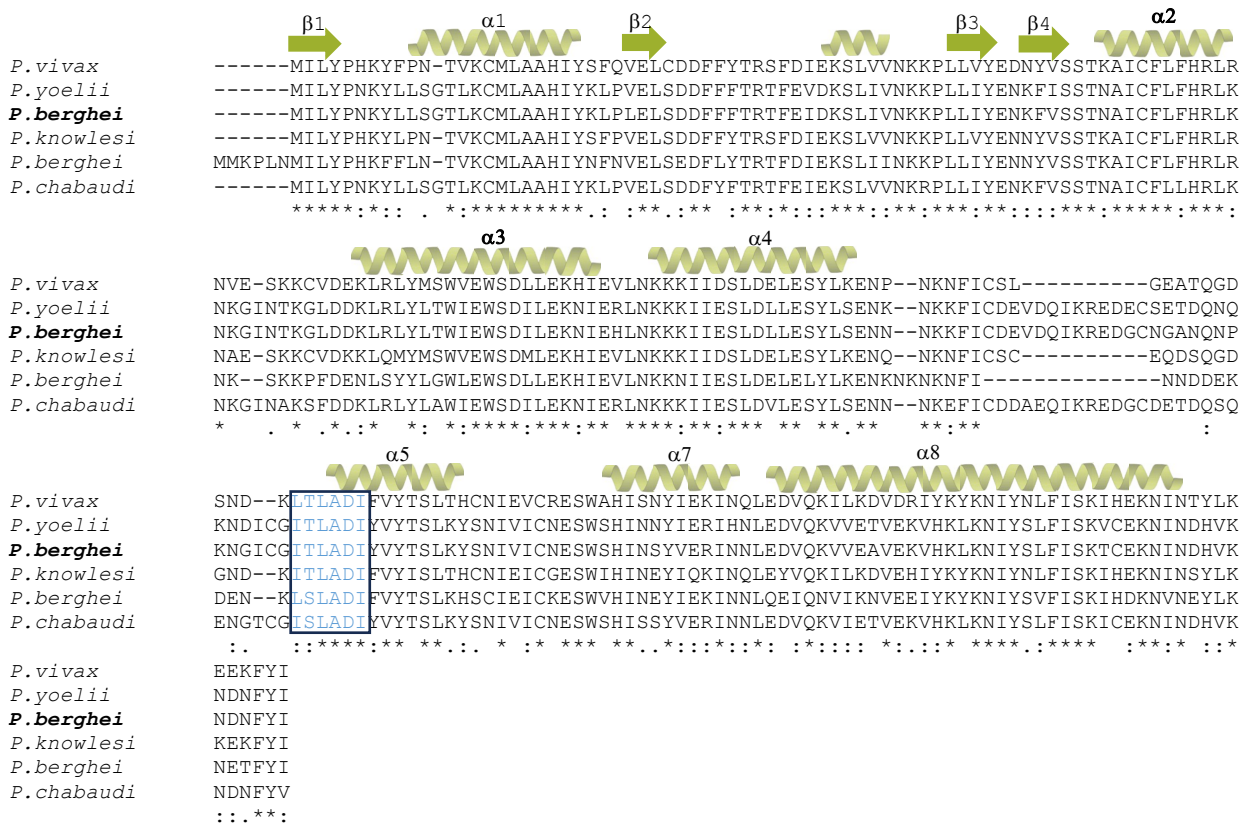

## THEILERIA

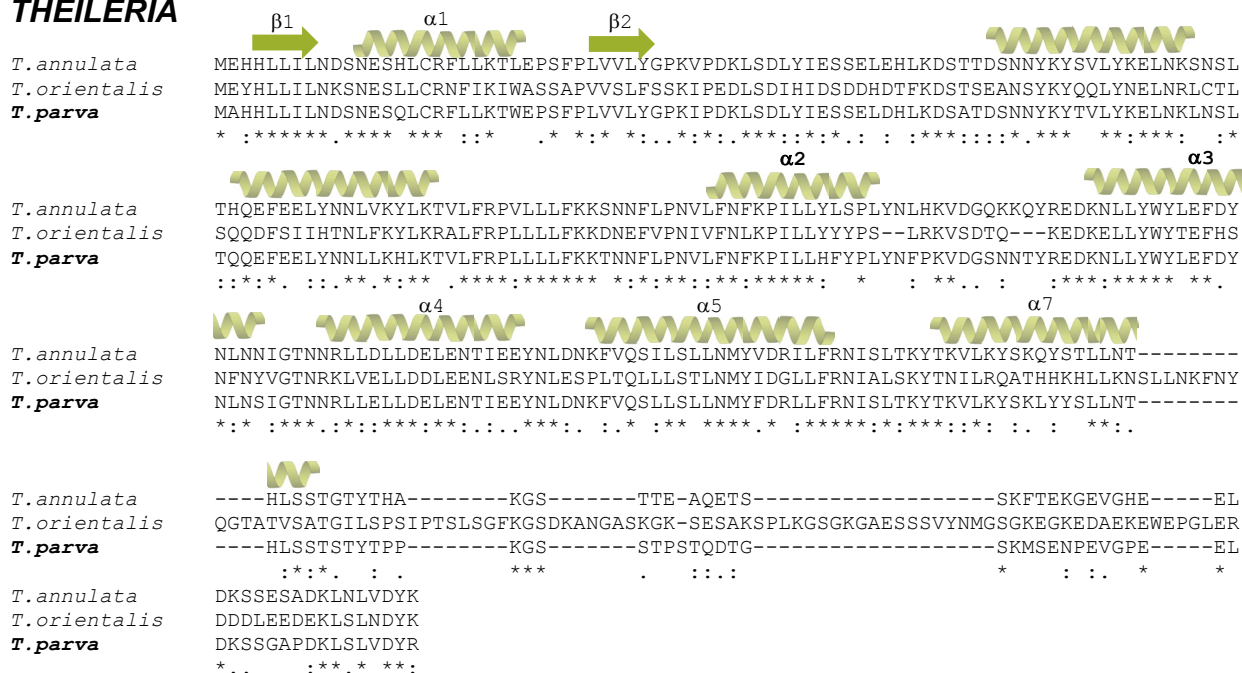

Figure S2

*B. bigemina*  
***B. bovis***  
*B. microti*

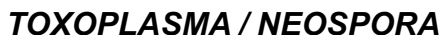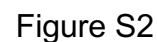

**F**

# PLASMODIUM

| Species | Sequence |
| --- | --- |
| *P. vivax* | MEHVEKIYIRNKAEKSDNFFYFYFNWVKLNFTCLIISENSSSLRSSVLELLNGKKVLVSEINVCEALFRLACGGI---- |
| *P. yoelii* | MEHIEKIYIKNKSDLGNEFFYFYFNWVKEKFNISLIVISENSSLRHNIVLELSDGNNLSLNELNSCAIFHLIISNDK---- |
| *P. berghei* | MEHVEKIYIKNTSDLGNEFFYFYFNWIKKFNISLIINESNSLRHNIVLELSEGNISLNELNSCVIFHIIIRNSH---- |
| *P. knowlesi* | MENVEKIYIRNKADLSDNFFYFYFNWVKLNFTCLIISENSSSLRSSILLELLNGKKVLVSEINACEALFRLTCGGV---- |
| *P. falciparum* | ---MEKIYSKNKLDYLSIIFNFYSWYKRHFKGTLLINENSNIKNTTLELLNGKKLLNEINACEAILKLNHHEHYDSS |
| *P. chabaudi* | MEPIEKIYIKNKSDLGNEFFYFYFNWIKKFNISLIISESSSLRHNIVLELPEGYKLPVLELNSCVIFRIICNGY---- |

:\*\*\* :\* : . : \* \* \* \* \* : : \* \* \* \* \* : : : \* \* . : : \* \* \* \* \* : : :

P. vivax -----SGE-----SSGGVSG-----EISDVSCHH  
 P. yoelii -----NSKNS-----KN-N-----QNNKHIWNNEFE-----SEQDVEENP  
 P. berghei -----NKK-----DNWGNFE-----NEQDVEENP  
 P. knowlesi -----SNAV-----GTVS-----CTVNCLSNGPVSG-----AQRDDFANR  
 P. falciparum SGTCNVNNINQPNNNNNNNKENINDNNNNNNKENINDNNNNNNKINNPCSTNSFNISFSTNNYNNFNNPCCSFSCNIYDY  
 P. chabaudi -----NKN-----NIWGNFE-----NEKDKEENP

P. vivax RIDALYAEELKFFLKGRLASDKPVDQFLERVEAEMALQ--KGFCCKER--LSFLEDFLFSIFKKAKVDQVEG--NKYPH  
 P. yoelii -FRISQIEELKNFLKNILLQKKKLENNFYERIEKEMMNKNNNIFSKDK--LRYIDFLFLFCILKKNKIEKIN--NKYEH  
 P. berghei -FKIVQIEELKQFLKNILLQKKKLENDFFEKIEENEMIKNNNIFAKDK--LRYVDFLLFCILKKNKIEKIN--PKYEN  
 P. knowlesi CRDTRLGEEELKFYLKEKLASEKPVDEQFLQRVEAEMALQ--KVFCCKDK--LSFLEDFLFSIFKKGKVEKLKDPGRYPH  
 P. falciparum -YDILKIEELKDFLKDFILRNKKINKEFFDTIEEDMTMWWKIFFFGQKKRTPEFLDFLLFYILKKENIHFFEE-ETRYIN  
 P. chabaudi -FKIVQIEELKHFLKDTLLQKKKLLDNDFFEKIEENEMICKN-TIFSKDK--LKYTDFLLFYILKQNKIEKIN--PKYEN

\*\*\* \*\* : . \* : : \* : : \* : \* : : : \* \* \* \* \* : : : : : \* : :

P. vivax LGAWLSKNN---FP--IKEEDMNSFAS  
 P. yoelii LNNWYLQNN---IS--VKEESMNSFTN  
 P. berghei LNNWFLKNN---IS--IKEESMSSFTN  
 P. knowlesi LSAWFSKNN---FT--IKEEDMNSFAS  
 P. falciparum LHNWFLKNKIYDISNDKKEDNTPSACN  
 P. chabaudi LNNWFLKNN---IS--IKEESMNSFTN

\* \* \* : : \* \* \* \* \* \*

## ***TOXOPLASMA / NEOSPORA***

***T. gondii***  
***N. caninum***

β1 α1 β2 β3

MALSPGAVLRLITRLASLPPLSTVTDVVLAYIEQNLKSAGDFTFSVQPDTSSTPAAPFRIAIVETKKKEQPSPIAAGEALSD  
MALSPGAVIRVTRLSSLPPLSTVTDVVLSYLEQHLKSAGGFTFSVPDTS SSPATPFRIAIVETKKGEAPRPIAGGEALSD  
\*\*\*\*\*:\*.\*\*\*:\*\*\*\*\*:\*.\*\*:\*:\*:\*:\*:\*:\*:\*:\*:\*:\*:\*:\*:\*:\*:\*:\*:\*:\*:\*:\*:\*:\*:\*:\*:\*:\*

α2 α3 α4

YAAARCIARLAASTGDPFASLLKASGAPGGVEAAVDVCEQWAAFYGVSGKAPEASDNPGLSACIDFFARRFSTSSSFLFG  
YAAARCVARLAASTGGVFACLLNENGATESADGAVDACEQWAAFCGVPGKTP EAAEHPLGTACIEFFTRRFSTSSAFLCN  
\*\*\*\*\*:\*\*\*\*\*. \*\*.\*\*: \*\*. . .: \*\*.\*\*\*\*\* \*\*.\*:\*\*\*::\*:\*:\*:\*:\*:\*:\*:\*:\*:\*:\*\* .

α5 α7

TPQPSLADMTL FALLKAHPAAQTALSSALRTSETAAKHFFSSWSACVAKAIPGAGALSGAGAKGTDRAKKGSGEMVG-QGA  
TPNPSLADMTL FALKLTQPAHTALLSALRTSGEAAKHFSAWSSSI AKALPGATTLSGAGVFPD-GSAQGNRGEISGATGA  
\*\*:\*:\*:\*:\*:\*:\*:\*:\*:\*:\*:\*:\*:\*:\*:\*:\*:\*:\*:\*:\*:\*:\*:\*:\*:\*:\*:\*:\*:\*:\*:\*:\*:\*:\*:\*:\*:\*:\*

***T. gondii***  
***N. caninum***

GVASEAVDGPDATTS  
GASPESTDGPDATAS  
\*.\*:\*.\*.\*.\*.\*.\*.\*.\*.\*.\*

Figure S2

G N-terminal extensions of YRSs

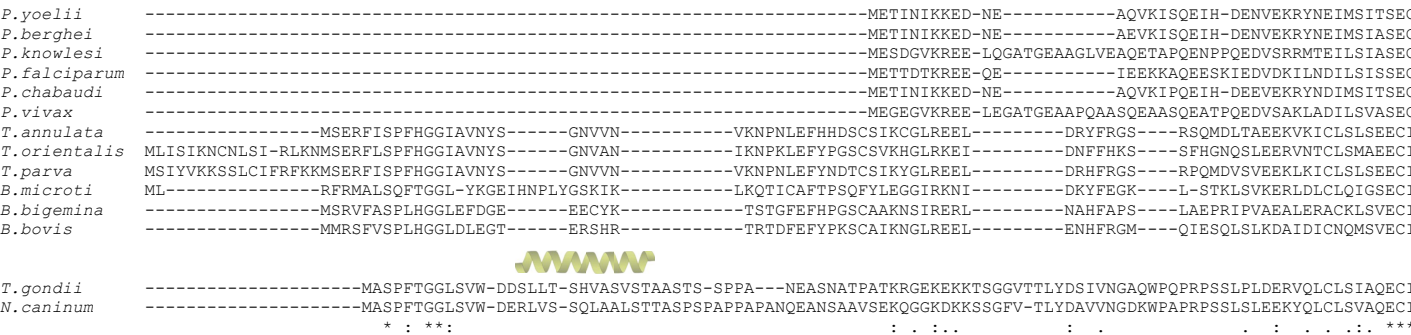

**Figure S2. Sequence alignment of GST-like domains present in *Apicomplexa* EF1 and multi-synthetase complexes.** Protein alignments were performed with M-Coffee [22]. The corresponding EupathDB annotations are given in Table S1. The complete sequences of AIMP<sub>s</sub> are shown with their EMAPII-like domain highlighted in grey. For EF1 subunits and aaRS<sub>s</sub>, alignments were performed on the full-length protein sequences, but only the GST-like domains involved in protein-protein interactions are shown. The RW motif in helix  $\alpha$ 7 and involved in interface 2 is highlighted in bold. The N-capping box ( $\phi$ -S/T-X-X-D- $\phi$ ) is shown in blue in the central helix  $\alpha$ 5, when present in the sequence. The GST-like domain of EF1 $\beta$  is reduced to only 3  $\alpha$ -helices including  $\alpha$ 5 and  $\alpha$ 7 which are sufficient to form an interface 2 with EF1 $\gamma$ . The strains used to run ColabFold modeling are indicated in bold and the corresponding secondary structures are displayed above the sequences or below for *N. caninum* proteins.

*P. berghei*

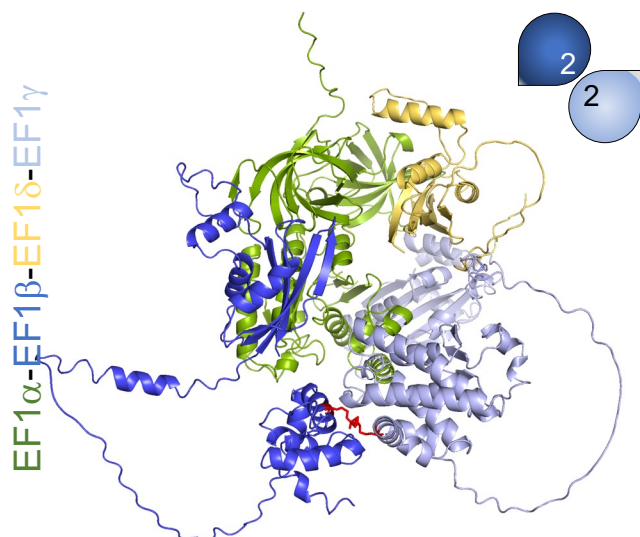

*T. gondii*

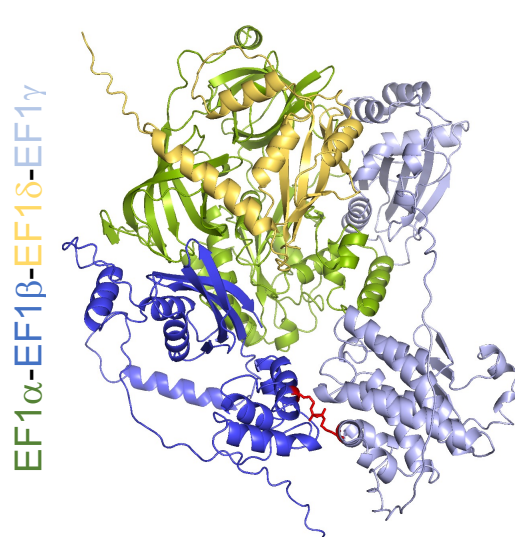

*N. caninum*

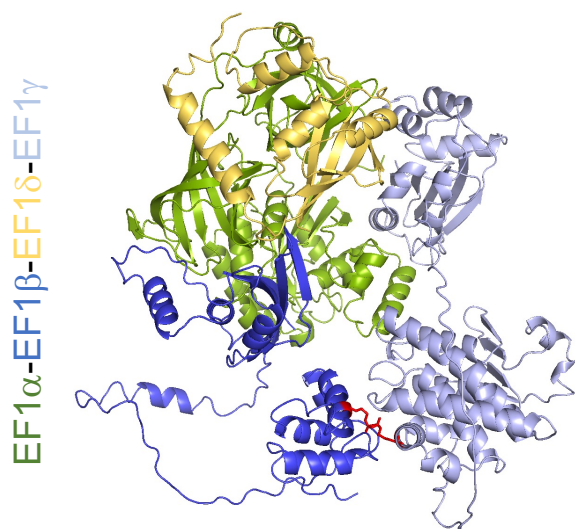

*C. parvum*

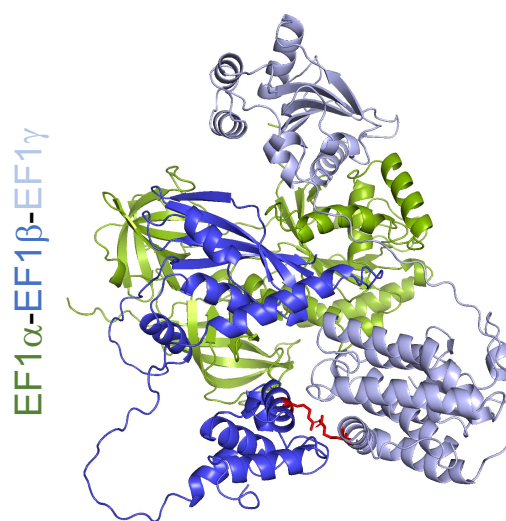

*T. parva*

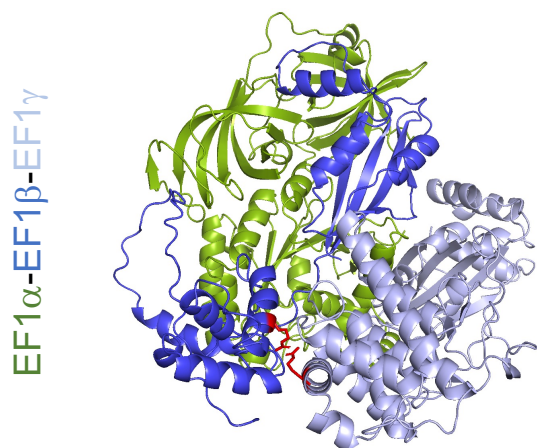

*B. bovis*

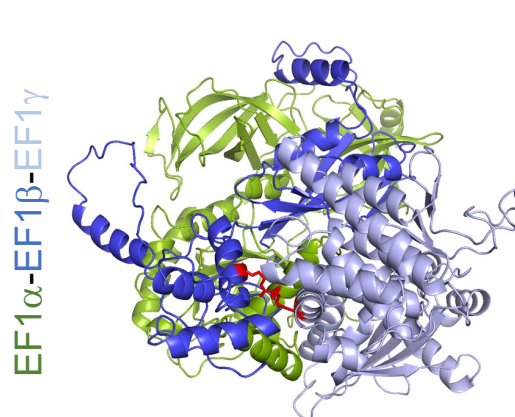

Figure S3

**Figure S3. Similarities between EF1 complexes in the *Apicomplexa* phylum.** Molecules are colored in blue for EF1 $\beta$ , light blue for EF1 $\gamma$ , green for EF1 $\alpha$ , and yellow for EF1 $\delta$ . All models are shown in "cartoon". GST-like domains are schematized with drop shapes, with the same color code. *Plasmodia*, *Toxoplasma* and *Neospora* complexes are tetramers while EF1 is a trimer (EF1 $\beta$ , EF1 $\gamma$ , and EF1 $\alpha$ ) in *Babesia*, *Theileria* and *Cryptosporidium*, due to the impossibility to identify subunit EF1 $\delta$  in the corresponding genomes. All EF1 $\beta$ -EF1 $\gamma$  heterodimers involve interface 2 shown in red; the parameters for each AlphaFold model are shown in Figure S4.

EF1

*Plasmodium*

**pTM**  
Rank\_1: 0.44  
Rank\_2: 0.43  
Rank\_3: 0.44  
Rank\_4: 0.48  
Rank\_5: 0.48

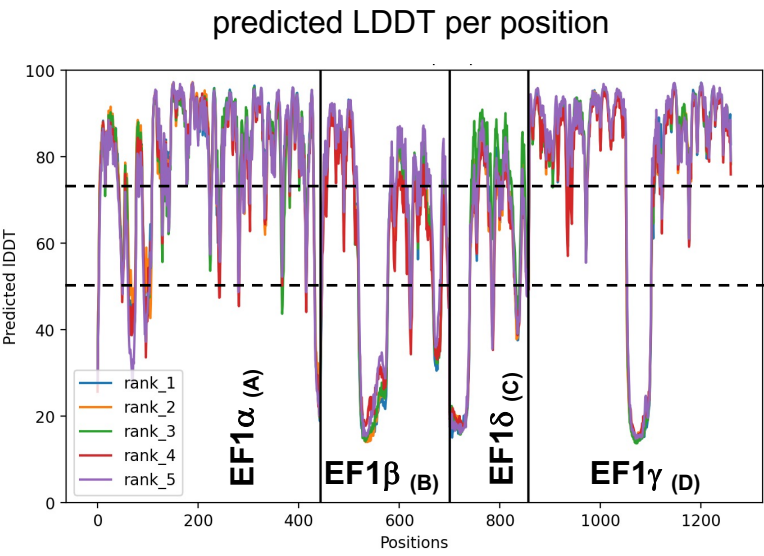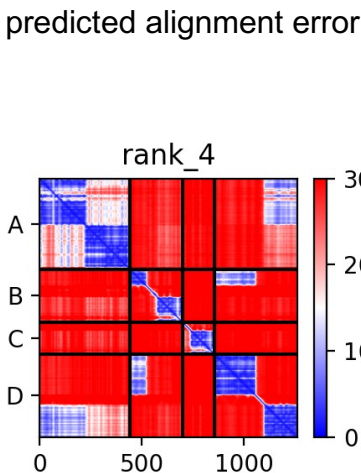

*Toxoplasma*

**pTM**  
Rank\_1: 0.45  
Rank\_2: 0.41  
Rank\_3: 0.5  
Rank\_4: 0.47  
Rank\_5: 0.48

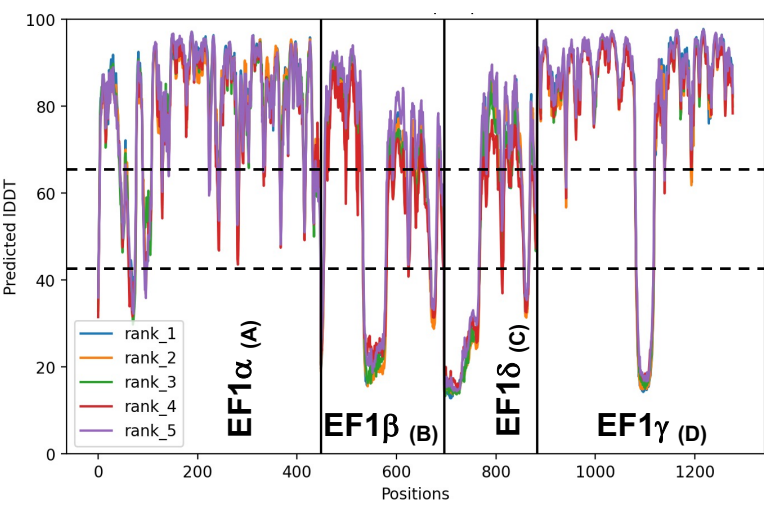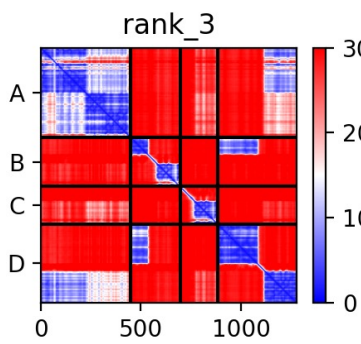

*Neospora*

**pTM**  
Rank\_1: 0.45  
Rank\_2: 0.42  
Rank\_3: 0.50  
Rank\_4: 0.45  
Rank\_5: 0.49

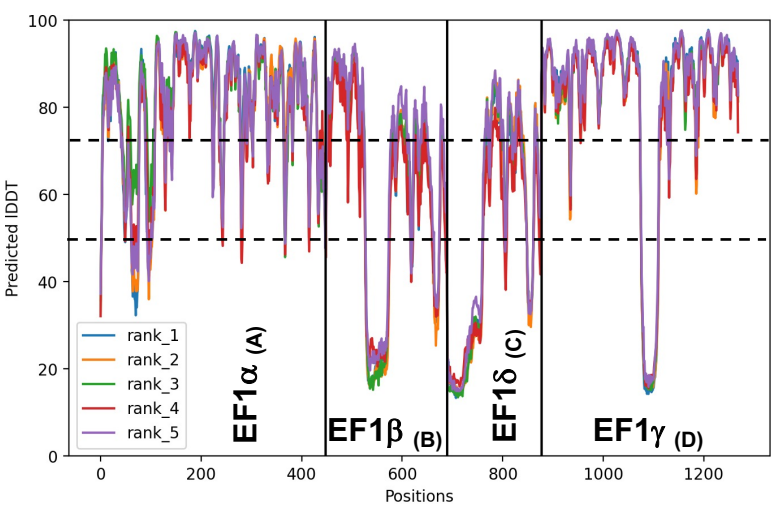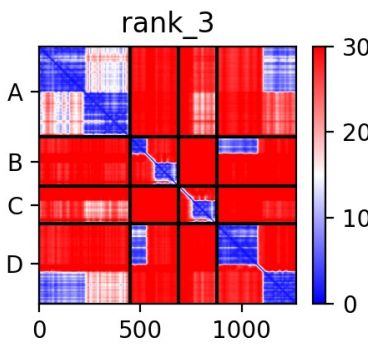

Figure S4

EF1

*Cryptosporidium*

pTM

Rank\_1: 0.48  
Rank\_2: 0.49  
Rank\_3: 0.56  
Rank\_4: 0.58  
Rank\_5: 0.57

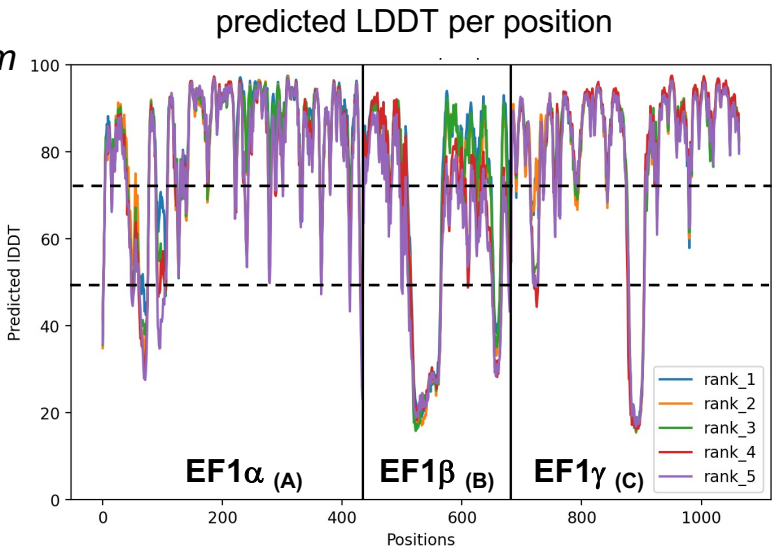

predicted alignment error

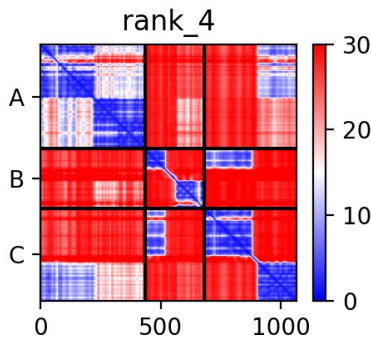

*Theileria*

pTM

Rank\_1: 0.51  
Rank\_2: 0.47  
Rank\_3: 0.59  
Rank\_4: 0.59  
Rank\_5: 0.57

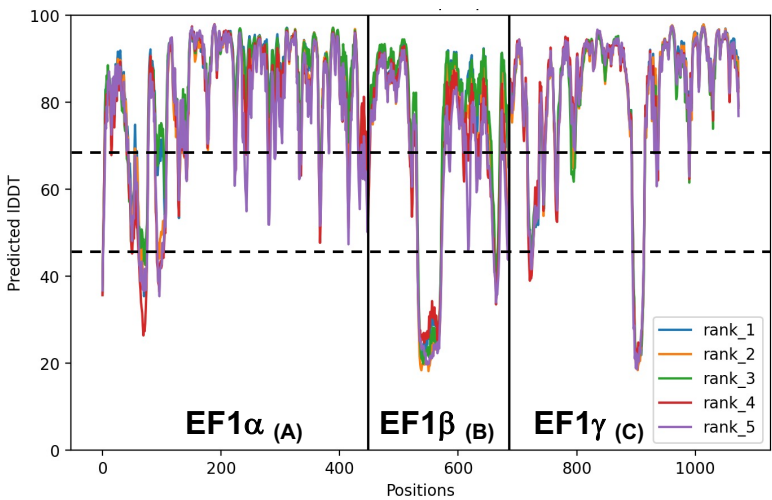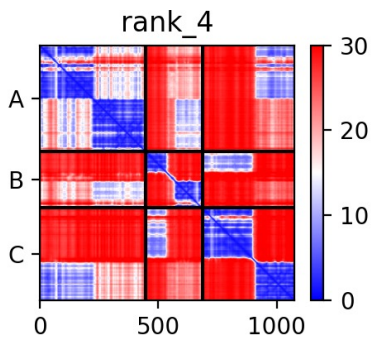

*Babesia*

pTM

Rank\_1: 0.51  
Rank\_2: 0.52  
Rank\_3: 0.63  
Rank\_4: 0.74  
Rank\_5: 0.6

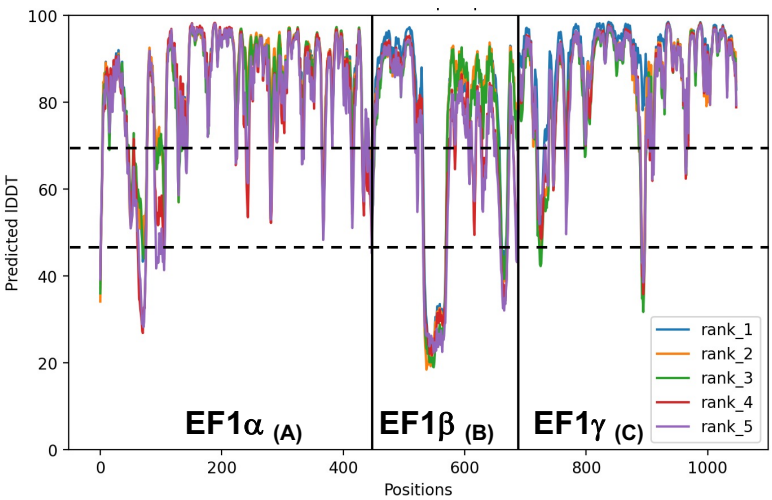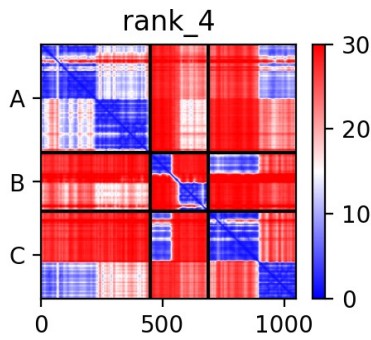

Figure S4

**Figure S4. Confidence metrics of the ColabFold predictions for EF1 GST-like backbones.**

Models were ranked by pTM (predicted Template Modeling) scores, which measures the overall topological accuracy of the predictions. Predictions with pTM scores higher than 0.5 and showing the known GST-like interfaces 1, 1' and 2 were considered relevant and are highlighted in bold. The central plots show the pLDDT (predicted Local Distance Difference Test) scores per position. Regions predicted with high confidence are identified by pLDDT > 70, while disordered regions are identified by pLDDT < 50 and are presented as long filaments (not shown in graphical representations). The PAE (predicted aligned error) plot on the left indicates that the relative positions of domains are well predicted (blue).

ERS-AIMP-MRS

QRS-ERS-AIMP-AIMP-ERS-QRS

MRS-tRip-ERS-ERS-tRip-MRS

**A** *Theileria parva*

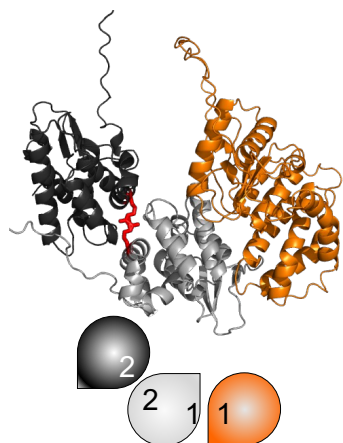

**B** *Babesia bovis*

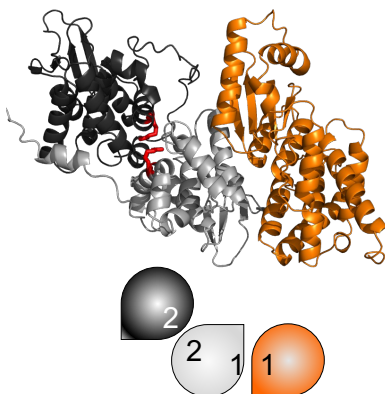

**C** *Saccharomyces cerevisiae*

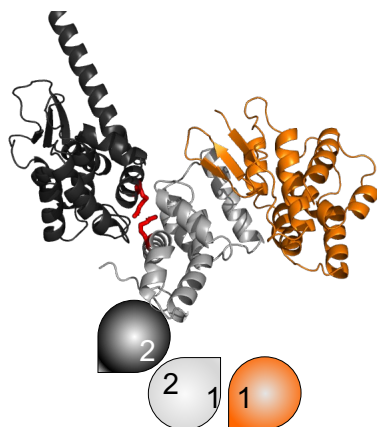

**D** *Plasmodium berghei*

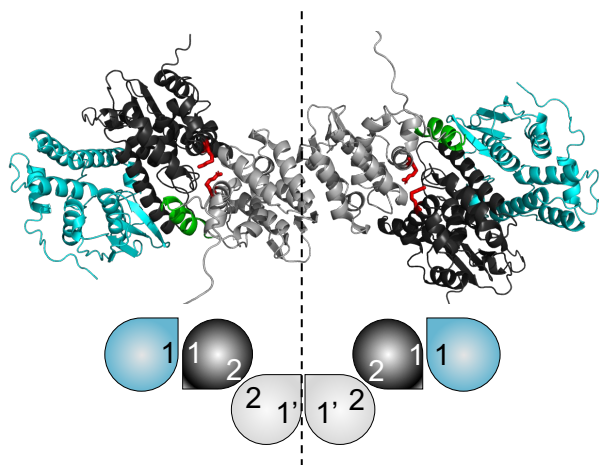

**E** *Toxoplasma gondii*

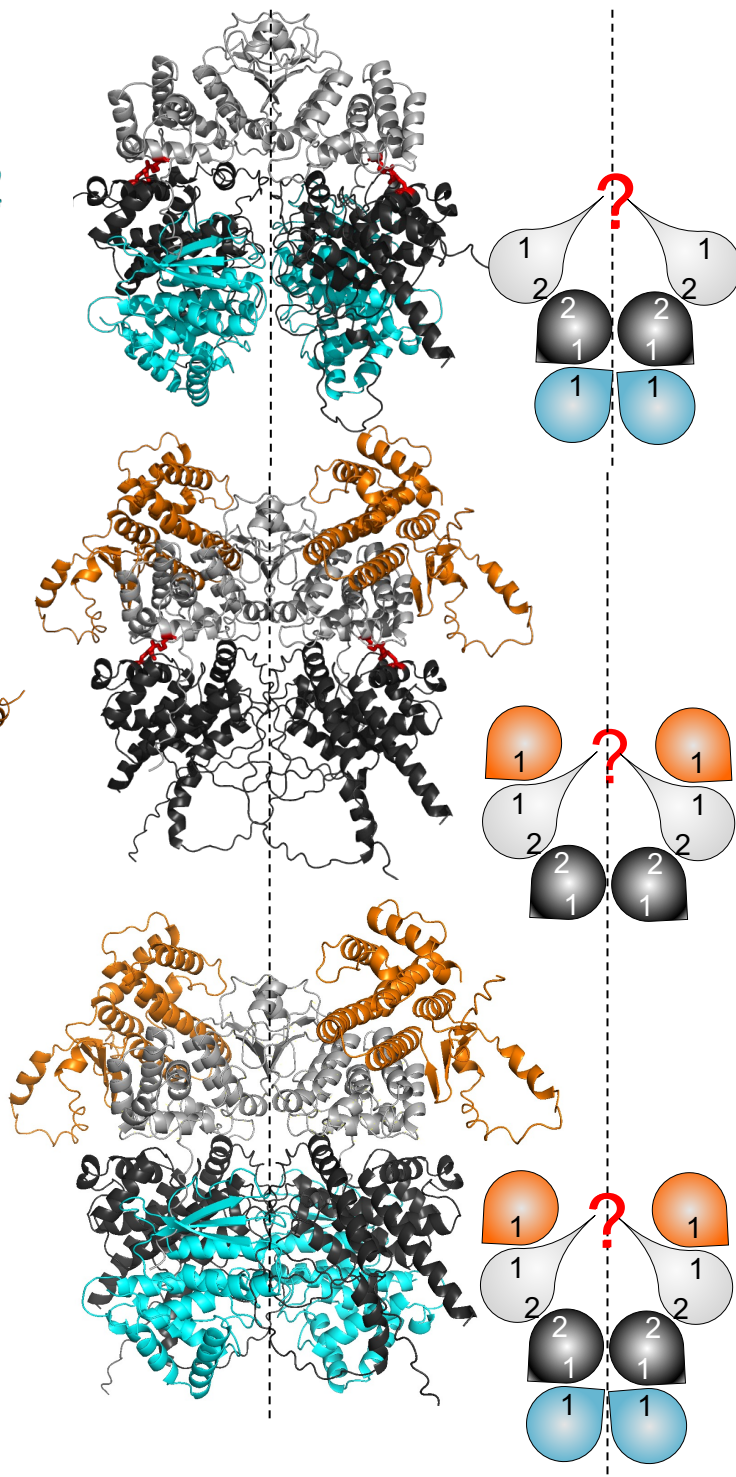

Figure S5

**Figure S5. Diversity of multi-synthetase complexes in the *Apicomplexa* phylum.** All complexes are shown in "cartoon" with the same color codes and schematized below with drop shapes colored grey for AIMP, black for ERS, blue for QRS, and orange for MRS, all displaying interfaces 1/1' and 2. In *Theileria* (**A**) and *Babesia* (**B**), MSCs are organized into AIMP-ERS-MRS trimers similar to the Arc1p-ERS-MRS trimer determined for *S. cerevisiae* MSC (**C**) [28,49]. (**D**) The M- and Q- complexes of *Plasmodium* were determined experimentally [17,18]. They both involve equivalent GST-like domains but organize differently. In the Q-complex, symmetry is imposed by the tRip homodimer (interface 1',[13]) that binds ERS via interface 2, which in turn binds QRS (interface 1). Alternatively, the M-complex is organized around the ERS homodimer. Accordingly, the tRip transmembrane helices  $\alpha 8$  (green) are equidistant and similarly oriented. (**E**) Two *Toxoplasma* MSCs have been modeled to mimic *Plasmodium* Q- and M-complexes. Both models show homodimerization of *Tg*-p43 through an unknown interface (?). This homomeric interaction, if biologically relevant, would allow the formation of a unique MSC (dimer of tetramers, Figure 4C). Moreover, the transmembrane helix  $\alpha 8$  is not predicted for *Tg*-p43.

# MSC

*S. cerevisiae*

predicted LDDT per position

predicted alignment error

pTM

Rank\_1: 0.91

Rank\_2: 0.91

Rank\_3: 0.90

Rank\_4: 0.91

Rank\_5: 0.90

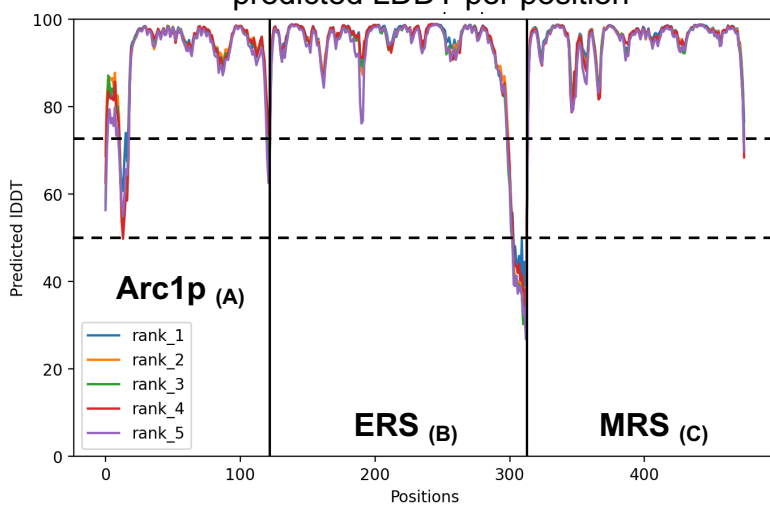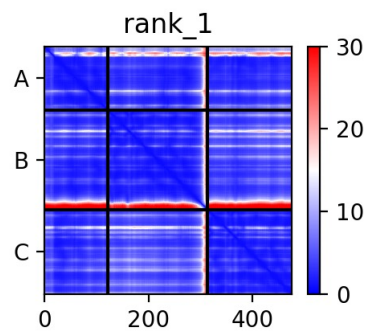

*Theileria*

pTM

Rank\_1: 0.58

Rank\_2: 0.57

Rank\_3: 0.56

Rank\_4: 0.57

Rank\_5: 0.57

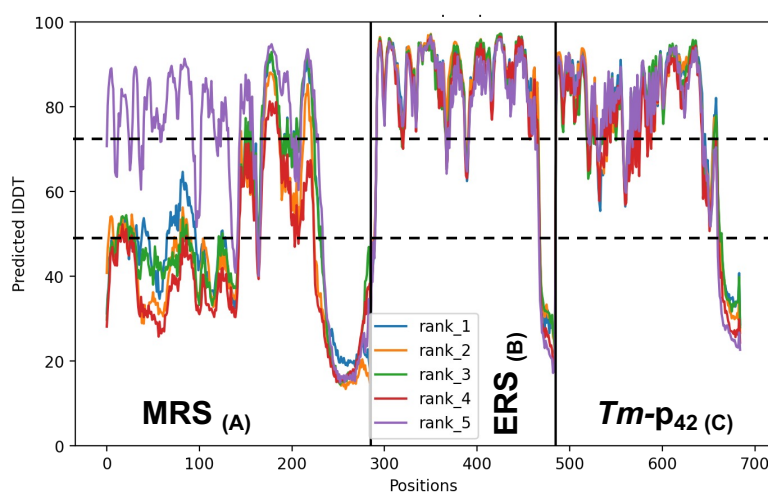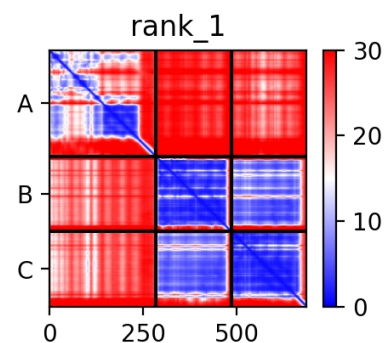

*Babesia*  
(custom templates)

pTM

Rank\_1: 0.90

Rank\_2: 0.89

Rank\_3: 0.89

Rank\_4: 0.89

Rank\_5: 0.88

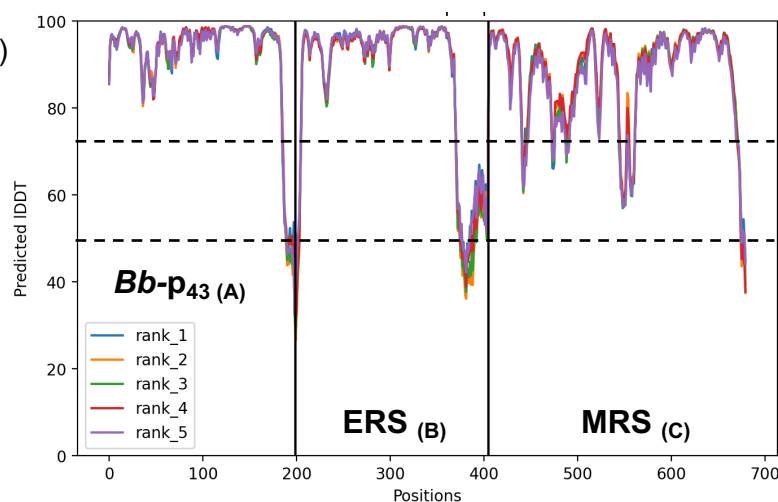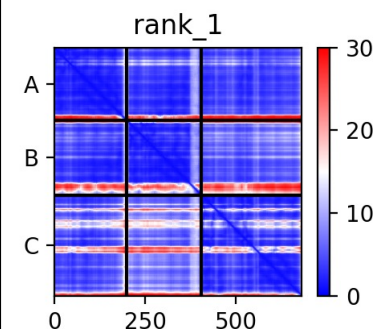

Figure S6

# MSC

## *Plasmodium*

**pTM**  
Rank\_1: 0.85  
Rank\_2: 0.84  
Rank\_3: 0.83  
Rank\_4: 0.83  
Rank\_5: 0.83

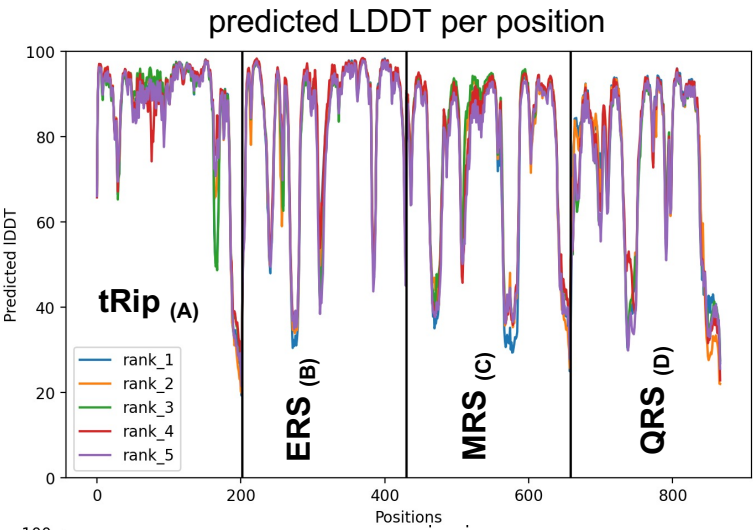

predicted alignment error

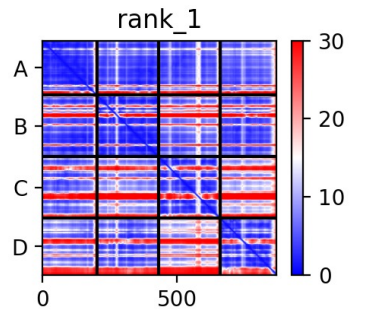

## *Toxoplasma*

**pTM**  
Rank\_1: 0.69  
Rank\_2: 0.39  
Rank\_3: 0.69  
Rank\_4: 0.61  
Rank\_5: 0.41

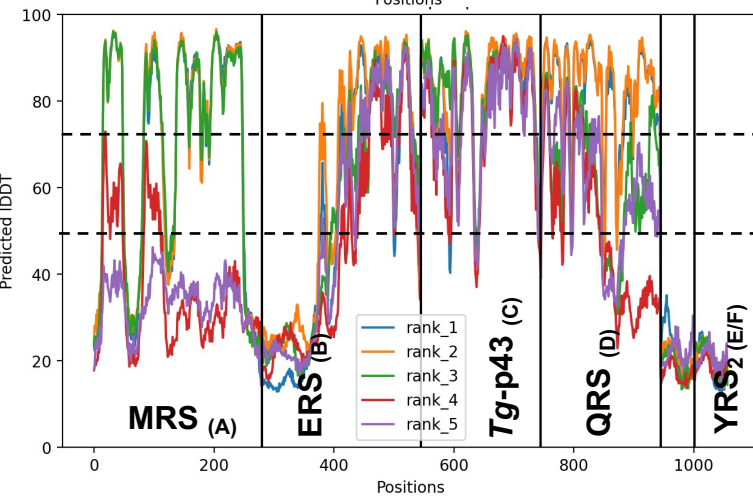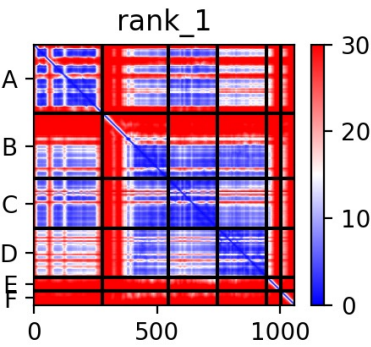

## *Neospora*

**pTM**  
Rank\_1: 0.49  
Rank\_2: 0.39  
Rank\_3: 0.58  
Rank\_4: 0.38  
Rank\_5: 0.32

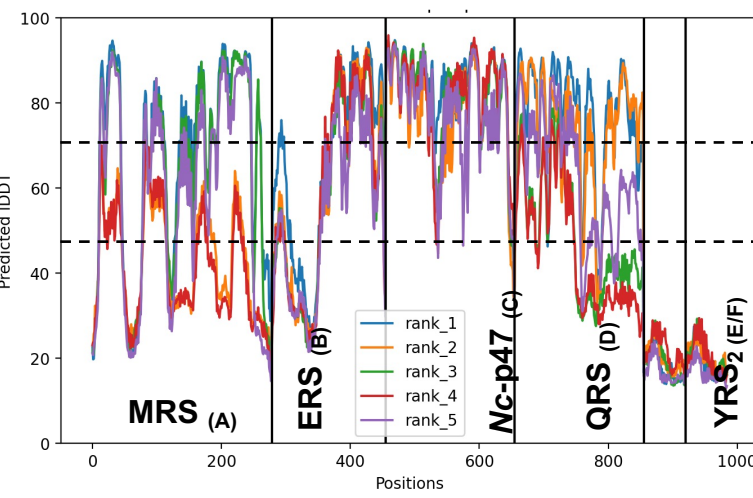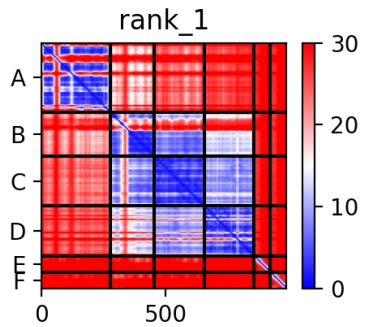

**Figure S6. Confidence metrics of the ColabFold predictions for GST-like interaction network of *S. cerevisiae* and *Apicomplexa* parasites. See legend Figure S5**

MSC

*Plasmodium*  
Q-complex

**pTM**  
**Rank\_1: 0.70**  
Rank\_2: 0.66  
Rank\_3: 0.66  
Rank\_4: 0.45  
Rank\_5: 0.43

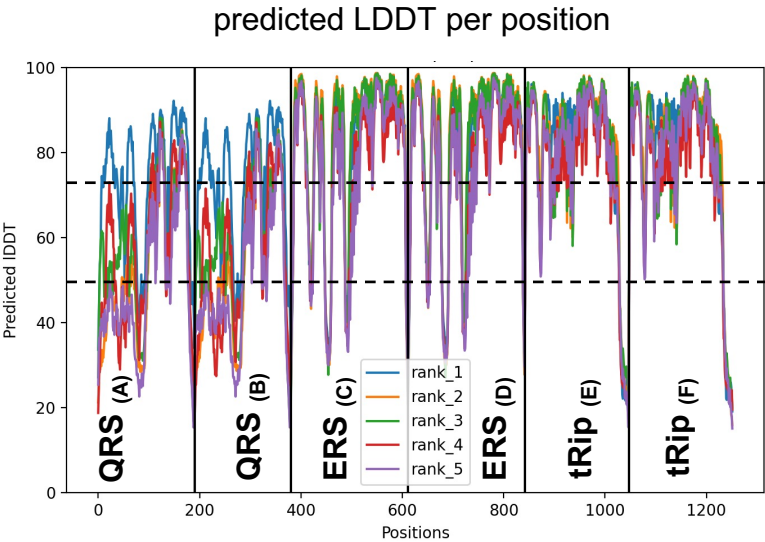

predicted alignment error

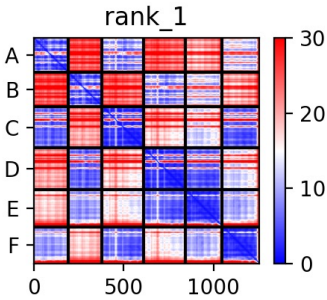

*Plasmodium*  
M-complex

**pTM**  
**Rank\_1: 0.74**  
**Rank\_2: 0.72**  
Rank\_3: 0.45  
Rank\_4: 0.36  
Rank\_5: 0.36

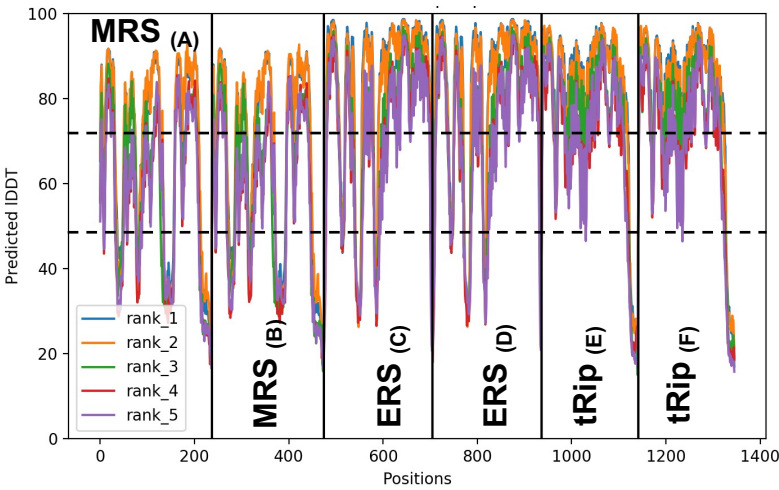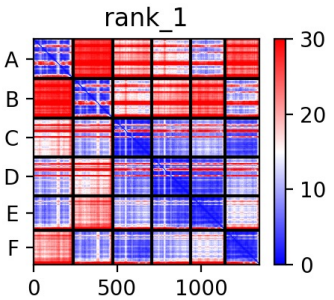

Figure S7

MSC

*Toxoplasma*  
Q-complex

**pTM**  
Rank\_1: 0.73  
Rank\_2: 0.72  
Rank\_3: 0.66  
Rank\_4: 0.65  
Rank\_5: 0.32

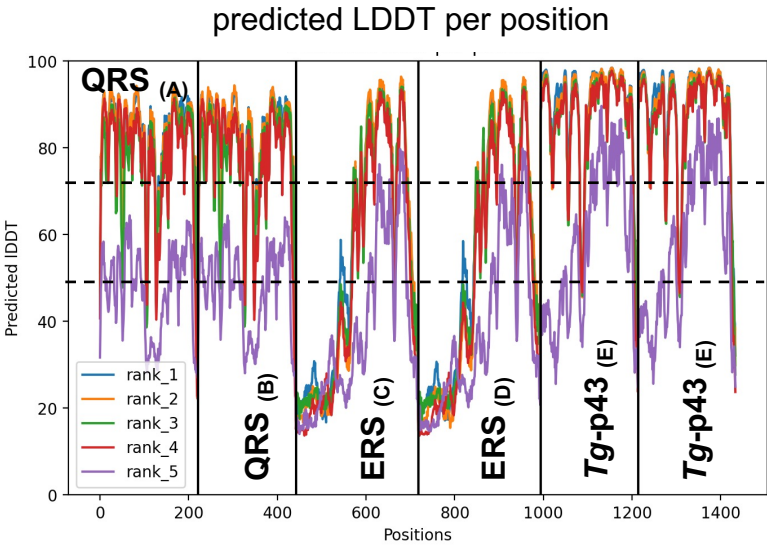

predicted alignment error

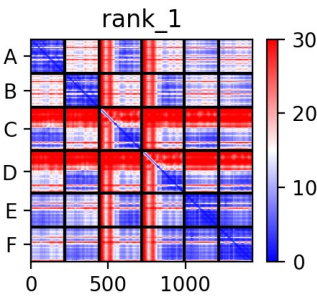

*Toxoplasma*  
M-complex

**pTM**  
Rank\_1: 0.73  
Rank\_2: 0.69  
Rank\_3: 0.69  
Rank\_4: 0.56  
Rank\_5: 0.49

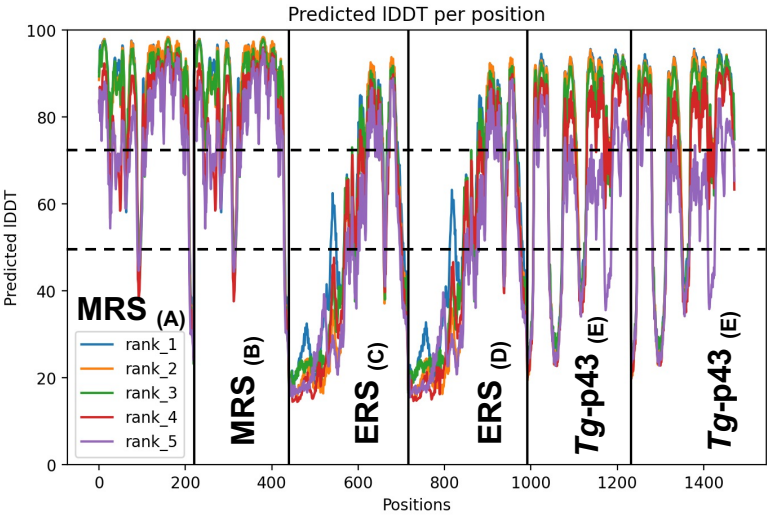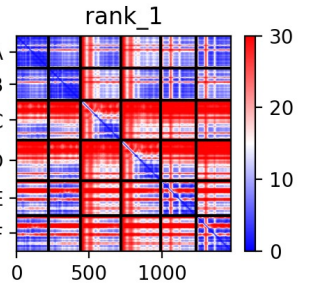

Figure S7. Confidence metrics of the ColabFold predictions for M- and Q-MSC GST-like backbones in *Plasmodium*, *Toxoplasma* and *Neosporidium*. See legend Figure S5
